# Supplementary material
Source: publisher figshare collection journal article supplement (https://frontiersin.figshare.com/ndownloader/files/28432182)
Supplement: Supplementary file [file 28432182]

A

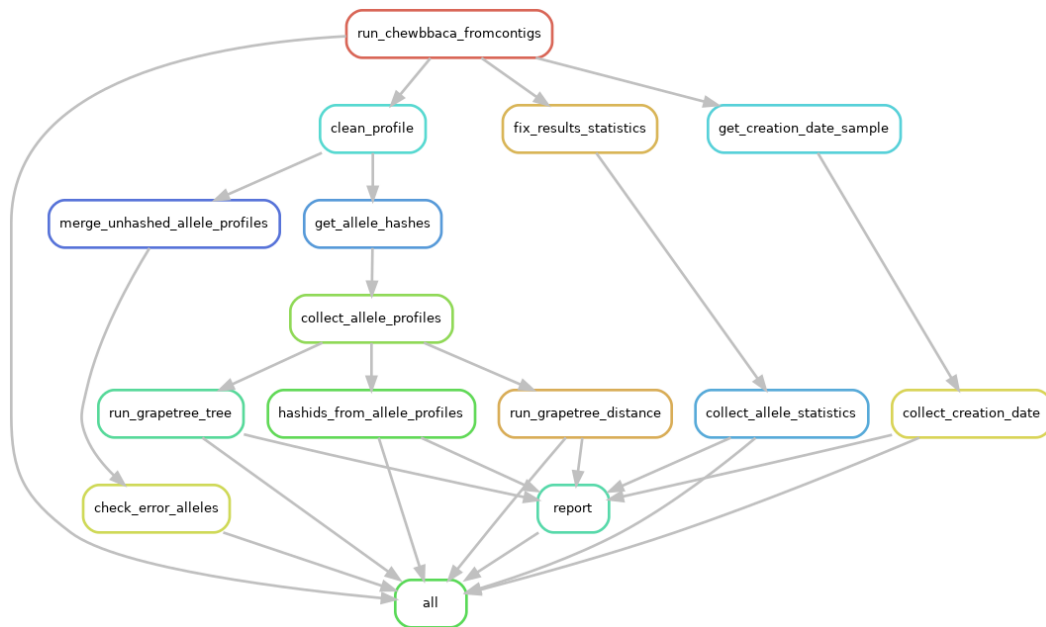

B

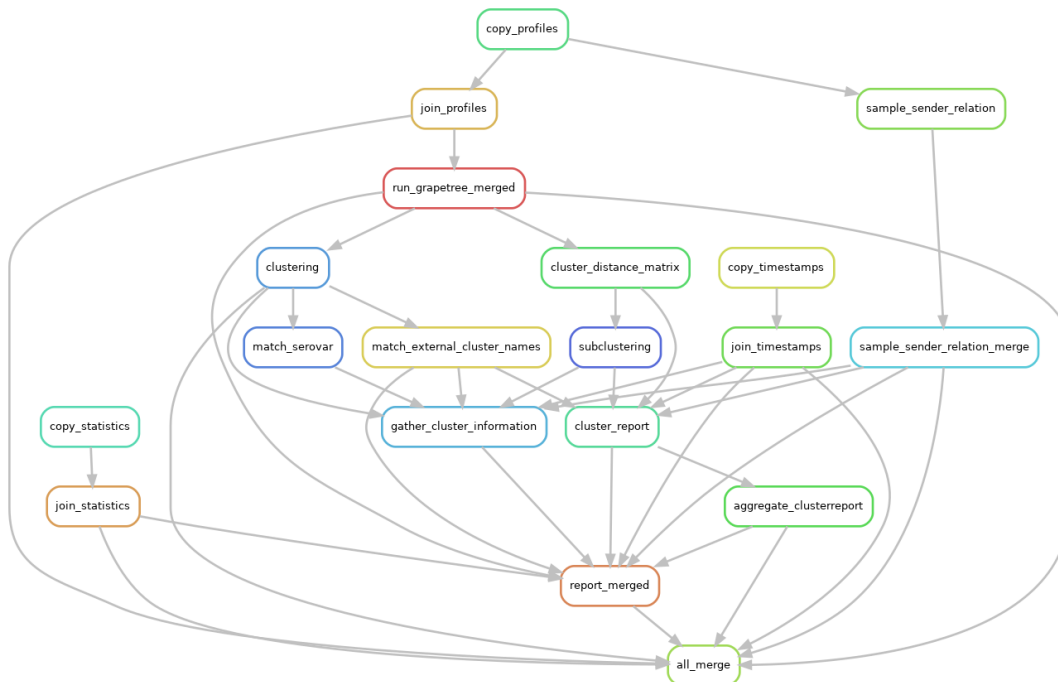

**Supplementary Figure 1. :** Directed acyclic graph (DAG) of chewieSnake (A) and chewieSnake\_join (B) workflow. The DAG shows how the different rules are connected in Snakemake to produce the final result. Rules that are called more than once (e.g. for each sample) are only shown once.
